# Supplementary material for: Determination of Pesticide Residues in Vine Leaves Using the QuEChERS Method and Liquid Chromatography-Tandem Mass Spectrometry
Source: MDPI journal article supplement (doi:10.3390/foods13060909), 2024-03-17
Supplement: s1 [file s1]

## Supplementary material

**Table S1.** The in-house validation data for 512 residues in brined vine leaves by LC-MS/MS.

| Pesticide                | LOQ<br>(mg kg <sup>-1</sup> ) | Recovery (%)             |                          | Repeatability<br>(%RSD <sub>r</sub> , n=5) |                          | Within-laboratory<br>reproducibility<br>(%RSD <sub>R</sub> , n=15) |                          | U (%) |
|--------------------------|-------------------------------|--------------------------|--------------------------|--------------------------------------------|--------------------------|--------------------------------------------------------------------|--------------------------|-------|
|                          |                               | 0.01 mg kg <sup>-1</sup> | 0.05 mg kg <sup>-1</sup> | 0.01 mg kg <sup>-1</sup>                   | 0.05 mg kg <sup>-1</sup> | 0.01 mg kg <sup>-1</sup>                                           | 0.05 mg kg <sup>-1</sup> |       |
| 2,4,5-T                  | 0.003                         | 112                      | 106                      | 4.8                                        | 1.8                      | 6.9                                                                | 8.2                      | 16.6  |
| 2,4,5-TP (Fenoprop)      | 0.002                         | 91                       | 93                       | 5.5                                        | 4.7                      | 10.9                                                               | 3.8                      | 19.1  |
| 2,4,6 trichlorophenol    | 0.007                         | 97                       | 92                       | 7.4                                        | 3.2                      | 18.6                                                               | 2.9                      | 26.8  |
| 2,4-D                    | 0.004                         | 110                      | 99                       | 2.7                                        | 3.1                      | 13.0                                                               | 4.8                      | 20.2  |
| 2,4-DB                   | 0.002                         | 106                      | 103                      | 5.9                                        | 3.8                      | 12.2                                                               | 7.1                      | 20.6  |
| 2,4-Dimethylaniline      | 0.006                         | 90                       | 96                       | 7.9                                        | 3.3                      | 15.3                                                               | 3.0                      | 23.1  |
| 2,4-DP (Dichlorprop)     | 0.003                         | 108                      | 104                      | 2.6                                        | 3.2                      | 5.4                                                                | 6.3                      | 12.7  |
| 2-Naphthyloxyacetic acid | 0.004                         | 111                      | 106                      | 5.4                                        | 1.6                      | 3.2                                                                | 3.9                      | 9.9   |
| 4-Chlorobenzoic acid     | 0.005                         | 104                      | 101                      | 4.4                                        | 7.2                      | 14.0                                                               | 6.4                      | 22.6  |
| 4-CPA                    | 0.005                         | 91                       | 103                      | 6.6                                        | 3.3                      | 9.6                                                                | 9.5                      | 20.1  |
| Abamectin                | 0.006                         | 83                       | 103                      | 10.0                                       | 2.4                      | 12.0                                                               | 8.9                      | 22.2  |
| Acephate                 | 0.003                         | 107                      | 107                      | 6.7                                        | 2.1                      | 14.8                                                               | 2.7                      | 21.8  |
| Acetamiprid              | 0.003                         | 92                       | 105                      | 8.3                                        | 4.0                      | 10.9                                                               | 6.9                      | 19.1  |
| Acetochlor               | 0.007                         | 101                      | 106                      | 7.1                                        | 2.3                      | 13.2                                                               | 1.9                      | 19.8  |
| Acibenzolar-S-methyl     | 0.005                         | 86                       | 111                      | 14.2                                       | 5.0                      | 8.7                                                                | 3.5                      | 15.2  |
| Aclonifen                | 0.004                         | 89                       | 106                      | 11.5                                       | 3.8                      | 2.6                                                                | 4.4                      | 10.4  |
| Alachlor                 | 0.003                         | 110                      | 104                      | 6.7                                        | 3.1                      | 8.4                                                                | 5.8                      | 15.3  |
| Aldicarb                 | 0.005                         | 115                      | 101                      | 2.2                                        | 5.5                      | 19.3                                                               | 3.3                      | 28.0  |
| Aldicarb sulfone         | 0.006                         | 111                      | 103                      | 3.0                                        | 6.0                      | 4.1                                                                | 7.6                      | 14.0  |
| Aldicarb sulfoxide       | 0.002                         | 98                       | 99                       | 8.1                                        | 3.9                      | 8.1                                                                | 5.1                      | 14.4  |
| Ametoctradin             | 0.006                         | 108                      | 92                       | 2.9                                        | 1.3                      | 14.3                                                               | 6.7                      | 22.8  |
| Amidosulfuron            | 0.008                         | 93                       | 95                       | 13.0                                       | 5.3                      | 17.7                                                               | 4.4                      | 27.1  |
| Aminocarb                | 0.006                         | 84                       | 103                      | 15.2                                       | 2.9                      | 17.1                                                               | 5.3                      | 26.1  |
| Aminopyralid             | 0.003                         | 100                      | 106                      | 8.3                                        | 2.3                      | 5.6                                                                | 9.5                      | 16.3  |
| Amisulbrom               | 0.008                         | 84                       | 107                      | 11.5                                       | 4.7                      | 14.7                                                               | 5.6                      | 23.5  |
| Amitraz                  | 0.002                         | 112                      | 102                      | 4.9                                        | 5.9                      | 15.9                                                               | 11.5                     | 28.0  |
| Anilazine                | 0.004                         | 92                       | 93                       | 3.5                                        | 1.3                      | 9.1                                                                | 4.2                      | 14.8  |
| Anilofos                 | 0.003                         | 107                      | 102                      | 9.2                                        | 6.0                      | 11.7                                                               | 8.6                      | 21.1  |
| Aramite                  | 0.007                         | 98                       | 97                       | 13.2                                       | 2.8                      | 8.8                                                                | 6.3                      | 16.8  |

|                                |       |     |     |      |     |      |      |      |
|--------------------------------|-------|-----|-----|------|-----|------|------|------|
| Atrazine                       | 0.004 | 98  | 102 | 10.0 | 3.1 | 7.7  | 14.3 | 23.8 |
| Atrazine-desethyl-desisopropyl | 0.010 | 107 | 100 | 12.4 | 2.5 | 8.0  | 8.3  | 17.2 |
| Atrazine-desethyl              | 0.003 | 106 | 107 | 6.7  | 2.9 | 15.2 | 4.9  | 23.5 |
| Azaconazole                    | 0.006 | 110 | 105 | 18.7 | 6.7 | 17.4 | 6.0  | 27.4 |
| Azadirachtin A                 | 0.009 | 104 | 93  | 12.1 | 2.7 | 18.0 | 6.1  | 27.9 |
| Azamethiphos                   | 0.007 | 105 | 96  | 9.7  | 0.8 | 6.0  | 5.4  | 12.5 |
| Azimsulfuron                   | 0.006 | 94  | 99  | 16.5 | 3.3 | 8.1  | 4.2  | 15.1 |
| Azinphos-ethyl                 | 0.008 | 106 | 96  | 9.1  | 1.4 | 9.7  | 2.9  | 15.6 |
| Azinphos-methyl                | 0.004 | 106 | 110 | 9.2  | 0.7 | 10.3 | 5.4  | 17.3 |
| Azoxystrobin                   | 0.005 | 99  | 104 | 11.2 | 5.7 | 14.0 | 10.3 | 25.4 |
| Barban                         | 0.006 | 100 | 105 | 5.3  | 6.4 | 13.5 | 8.1  | 24.9 |
| Benalaxyl                      | 0.004 | 114 | 101 | 2.3  | 3.9 | 18.2 | 9.4  | 29.3 |
| Benazolin                      | 0.005 | 99  | 104 | 16.1 | 2.2 | 16.1 | 3.7  | 25.1 |
| Bendiocarb                     | 0.007 | 105 | 104 | 13.3 | 5.4 | 9.4  | 8.4  | 19.3 |
| Benflubutamid                  | 0.004 | 80  | 96  | 12.7 | 5.3 | 17.7 | 5.4  | 28.1 |
| Benfluralin                    | 0.005 | 102 | 91  | 8.1  | 0.7 | 8.9  | 5.6  | 15.9 |
| Benfuracarb                    | 0.004 | 92  | 104 | 5.3  | 3.4 | 10.1 | 12.7 | 23.8 |
| Benomyl                        | 0.003 | 84  | 92  | 15.2 | 3.3 | 12.4 | 8.9  | 22.7 |
| Benoxacor                      | 0.008 | 97  | 109 | 4.1  | 3.4 | 15.9 | 5.7  | 24.6 |
| Bensulfuron-methyl             | 0.006 | 101 | 101 | 6.8  | 3.1 | 13.0 | 7.4  | 21.9 |
| Bentazone                      | 0.005 | 97  | 96  | 13.9 | 5.8 | 5.8  | 4.6  | 12.3 |
| Bicyclopyrone                  | 0.003 | 93  | 104 | 4.9  | 2.8 | 5.5  | 5.6  | 12.1 |
| Bifenazate                     | 0.002 | 101 | 105 | 9.7  | 3.5 | 7.1  | 6.7  | 14.9 |
| Bifenox                        | 0.006 | 93  | 106 | 17.8 | 4.4 | 11.0 | 4.1  | 18.6 |
| Bifenthrin                     | 0.004 | 103 | 104 | 4.6  | 3.8 | 9.4  | 9.9  | 19.6 |
| Bioresmethrin                  | 0.007 | 104 | 102 | 9.5  | 1.6 | 4.0  | 5.6  | 10.7 |
| Bispyribac sodium              | 0.003 | 94  | 99  | 7.9  | 2.2 | 8.8  | 3.0  | 13.7 |
| Bitertanol                     | 0.005 | 105 | 101 | 8.7  | 3.1 | 5.1  | 3.0  | 10.5 |
| Bixafen                        | 0.006 | 94  | 94  | 8.3  | 1.3 | 5.2  | 9.5  | 16.0 |
| Boscalid                       | 0.004 | 93  | 100 | 13.9 | 5.9 | 4.8  | 9.6  | 16.7 |
| Bromacil                       | 0.005 | 104 | 104 | 9.1  | 6.8 | 16.8 | 7.0  | 26.2 |
| Bromophos-ethyl                | 0.007 | 104 | 97  | 6.2  | 4.0 | 7.7  | 5.3  | 14.3 |
| Bromoxynil                     | 0.004 | 106 | 102 | 7.7  | 5.7 | 9.2  | 4.6  | 16.0 |
| Bromuconazole                  | 0.005 | 86  | 102 | 9.8  | 8.1 | 11.3 | 8.8  | 21.3 |
| Bupirimate                     | 0.005 | 102 | 105 | 12.0 | 6.2 | 6.7  | 4.9  | 13.3 |
| Buprofezine                    | 0.005 | 93  | 103 | 18.1 | 4.7 | 4.6  | 13.3 | 21.2 |

|                            |       |     |     |      |     |      |      |      |
|----------------------------|-------|-----|-----|------|-----|------|------|------|
| Butafenacil                | 0.008 | 97  | 103 | 10.6 | 3.0 | 14.3 | 5.9  | 22.8 |
| Butocarboxim               | 0.003 | 95  | 99  | 10.8 | 5.2 | 15.8 | 4.4  | 24.2 |
| Butocarboxim-sulfoxide     | 0.004 | 76  | 95  | 3.6  | 2.3 | 5.3  | 10.4 | 16.7 |
| Butralin                   | 0.005 | 101 | 98  | 7.9  | 1.6 | 19.1 | 8.4  | 30.0 |
| Buturon                    | 0.006 | 110 | 107 | 7.6  | 3.6 | 18.5 | 14.8 | 33.9 |
| Butylate                   | 0.005 | 93  | 98  | 13.6 | 3.3 | 18.6 | 8.2  | 29.4 |
| Cadusafos                  | 0.002 | 109 | 104 | 3.7  | 4.1 | 15.3 | 9.6  | 25.9 |
| Carbaryl                   | 0.003 | 92  | 104 | 15.6 | 7.5 | 9.5  | 9.0  | 19.8 |
| Carbendazim/Benomyl        | 0.002 | 96  | 96  | 4.4  | 2.7 | 6.5  | 8.2  | 15.2 |
| Carbetamide                | 0.004 | 90  | 105 | 5.3  | 6.7 | 8.9  | 10.2 | 19.6 |
| Carbofuran                 | 0.002 | 106 | 106 | 9.9  | 2.5 | 18.5 | 6.6  | 28.3 |
| Carbofuran-3-hydroxy       | 0.003 | 98  | 105 | 14.1 | 5.9 | 5.2  | 9.9  | 17.1 |
| Carbosulfan                | 0.007 | 89  | 104 | 13.6 | 5.9 | 14.8 | 10.8 | 26.8 |
| Carboxin                   | 0.003 | 82  | 105 | 12.5 | 3.6 | 12.8 | 8.3  | 22.7 |
| Carfentrazone-ethyl        | 0.007 | 85  | 97  | 12.3 | 9.6 | 12.6 | 4.3  | 20.3 |
| Chlorantraniliprole        | 0.007 | 98  | 102 | 16.3 | 5.5 | 12.0 | 7.2  | 21.7 |
| Chlorbromuron              | 0.005 | 106 | 105 | 13.6 | 7.4 | 17.5 | 8.7  | 28.9 |
| Chlorbufam                 | 0.007 | 93  | 101 | 13.4 | 7.6 | 7.7  | 4.0  | 14.9 |
| Chlorfenvinphos            | 0.002 | 109 | 104 | 5.4  | 3.9 | 12.7 | 4.6  | 20.2 |
| Chlorfluazuron             | 0.004 | 97  | 101 | 7.3  | 4.7 | 8.3  | 3.8  | 14.3 |
| Chloridazon                | 0.004 | 93  | 106 | 7.6  | 2.3 | 4.4  | 7.9  | 13.8 |
| Chlormequat chloride       | 0.005 | 92  | 97  | 14.4 | 2.6 | 17.3 | 8.1  | 27.8 |
| Chlorotoluron              | 0.006 | 94  | 92  | 12.5 | 2.3 | 18.7 | 3.7  | 27.6 |
| Chloroxuron                | 0.006 | 115 | 100 | 4.3  | 2.9 | 3.5  | 9.9  | 15.3 |
| Chlorpropham               | 0.003 | 100 | 105 | 5.4  | 4.8 | 9.1  | 9.1  | 18.7 |
| Chlorpyrifos               | 0.002 | 98  | 106 | 6.7  | 0.7 | 10.9 | 3.2  | 16.6 |
| Chlorpyrifos methyl        | 0.002 | 93  | 97  | 7.4  | 2.0 | 8.3  | 5.0  | 14.3 |
| Chlorsulfuron              | 0.005 | 115 | 100 | 2.2  | 5.8 | 17.5 | 10.1 | 29.2 |
| Chlortal-dimethyl          | 0.006 | 98  | 94  | 13.2 | 3.3 | 16.6 | 9.1  | 27.6 |
| Cinidon-ethyl              | 0.006 | 115 | 106 | 5.0  | 2.4 | 12.0 | 5.8  | 19.9 |
| Clethodim                  | 0.004 | 100 | 93  | 11.7 | 2.4 | 13.7 | 10.3 | 24.9 |
| Climbazole                 | 0.007 | 110 | 109 | 8.0  | 3.8 | 9.2  | 7.2  | 17.6 |
| Clodinafop-propargyl ester | 0.004 | 78  | 107 | 8.5  | 1.3 | 7.3  | 3.0  | 12.0 |
| Clofentezine               | 0.004 | 94  | 100 | 6.7  | 4.5 | 4.7  | 7.0  | 13.0 |
| Clomazone                  | 0.007 | 114 | 105 | 7.5  | 4.3 | 18.7 | 10.2 | 30.8 |
| Clopyralid                 | 0.007 | 93  | 95  | 6.4  | 4.4 | 15.5 | 6.7  | 24.6 |

|                                     |       |     |     |      |     |      |      |      |
|-------------------------------------|-------|-----|-----|------|-----|------|------|------|
| Cloquintocet-methylhexyl ester      | 0.006 | 105 | 92  | 8.8  | 1.4 | 8.8  | 4.2  | 15.4 |
| Clothianidin                        | 0.002 | 108 | 102 | 7.7  | 1.8 | 17.9 | 3.2  | 26.4 |
| Coumaphos                           | 0.007 | 105 | 107 | 14.5 | 1.1 | 18.8 | 13.2 | 33.6 |
| Cyanazine                           | 0.007 | 102 | 108 | 11.0 | 4.0 | 12.1 | 6.1  | 20.5 |
| Cyanophos                           | 0.006 | 109 | 110 | 18.6 | 5.6 | 12.8 | 9.5  | 24.5 |
| Cyantraniliprole                    | 0.007 | 98  | 91  | 9.3  | 2.1 | 15.2 | 5.3  | 23.8 |
| Cyazofamid                          | 0.006 | 102 | 100 | 8.1  | 7.3 | 12.9 | 4.7  | 20.7 |
| Cyclanilide                         | 0.004 | 88  | 103 | 6.2  | 1.7 | 11.0 | 2.9  | 16.8 |
| Cycloate                            | 0.003 | 111 | 100 | 2.8  | 4.8 | 11.1 | 2.6  | 16.6 |
| Cycloxydim                          | 0.005 | 111 | 93  | 6.1  | 3.4 | 6.5  | 5.8  | 13.2 |
| Cyflumetofen                        | 0.001 | 98  | 92  | 9.3  | 2.8 | 9.1  | 7.1  | 17.2 |
| Cyhalafop-buthyl                    | 0.006 | 76  | 101 | 11.4 | 2.1 | 18.5 | 3.9  | 27.5 |
| Cymoxanil                           | 0.006 | 80  | 94  | 9.4  | 3.4 | 5.2  | 5.5  | 11.6 |
| Cypermethrin (alpha+beta+teta+zeta) | 0.004 | 96  | 104 | 8.6  | 3.1 | 9.1  | 7.5  | 18.0 |
| Cyproconazole                       | 0.006 | 102 | 102 | 14.2 | 2.5 | 11.4 | 8.8  | 21.8 |
| Cyprodinil                          | 0.004 | 107 | 104 | 4.9  | 4.8 | 8.8  | 8.5  | 18.2 |
| Cyromazine                          | 0.002 | 88  | 100 | 11.8 | 4.0 | 14.0 | 8.9  | 25.1 |
| Daminozide                          | 0.003 | 93  | 102 | 13.6 | 8.6 | 11.8 | 4.8  | 21.0 |
| Dazomet                             | 0.007 | 87  | 93  | 18.9 | 2.7 | 19.2 | 5.2  | 29.2 |
| Deltamethrin                        | 0.005 | 105 | 105 | 4.7  | 3.1 | 7.4  | 11.3 | 20.0 |
| Demeton-S-methyl                    | 0.003 | 109 | 101 | 7.2  | 6.0 | 6.0  | 7.3  | 14.8 |
| Demeton-S-methyl sulfone            | 0.003 | 96  | 101 | 11.2 | 4.2 | 10.8 | 5.5  | 18.4 |
| Demeton-S-methyl sulfoxide          | 0.002 | 91  | 104 | 16.3 | 4.1 | 10.9 | 9.8  | 21.8 |
| Desmedipham                         | 0.004 | 77  | 94  | 9.9  | 3.0 | 13.9 | 5.3  | 21.7 |
| Desmetryn                           | 0.009 | 111 | 93  | 16.9 | 2.6 | 14.6 | 3.4  | 22.9 |
| Diafenthiuron                       | 0.003 | 102 | 102 | 8.4  | 3.6 | 14.3 | 9.5  | 24.7 |
| Dialifos                            | 0.008 | 108 | 93  | 11.3 | 1.0 | 18.5 | 14.8 | 34.0 |
| Diallate                            | 0.008 | 94  | 105 | 11.6 | 2.9 | 9.5  | 4.6  | 15.8 |
| Diazinon                            | 0.004 | 114 | 104 | 4.2  | 4.4 | 18.4 | 4.7  | 27.8 |
| Dicamba                             | 0.004 | 115 | 98  | 2.4  | 4.0 | 15.5 | 2.9  | 23.6 |
| Dichlofenthion                      | 0.004 | 104 | 98  | 13.0 | 5.3 | 9.0  | 3.1  | 15.2 |
| Dichlofluanid                       | 0.001 | 109 | 106 | 6.2  | 3.8 | 9.7  | 7.0  | 18.1 |
| Dichlorvos (DDVP)                   | 0.005 | 92  | 103 | 12.0 | 2.9 | 14.7 | 6.2  | 23.4 |
| Diclobutrazol                       | 0.007 | 93  | 99  | 8.1  | 4.3 | 10.5 | 3.1  | 16.5 |
| Diclofop-methyl                     | 0.008 | 110 | 105 | 5.0  | 1.9 | 13.7 | 10.0 | 24.5 |

|                        |       |     |     |      |     |      |      |      |
|------------------------|-------|-----|-----|------|-----|------|------|------|
| Dicrotophos            | 0.006 | 97  | 97  | 7.4  | 1.2 | 16.7 | 5.1  | 25.0 |
| Diethofencarb          | 0.002 | 79  | 96  | 5.5  | 5.5 | 17.3 | 3.0  | 25.6 |
| Difenoconazole         | 0.002 | 109 | 104 | 4.9  | 5.6 | 14.4 | 13.0 | 27.9 |
| Diflubenzuron          | 0.006 | 101 | 101 | 12.9 | 6.6 | 13.4 | 16.1 | 30.4 |
| Diflufenican           | 0.003 | 102 | 101 | 4.9  | 6.0 | 9.0  | 6.4  | 16.5 |
| Dimethachlor           | 0.005 | 98  | 102 | 17.2 | 7.4 | 4.3  | 2.7  | 10.7 |
| Dimethenamid           | 0.004 | 102 | 103 | 7.2  | 5.0 | 4.5  | 4.7  | 10.3 |
| Dimethoate             | 0.003 | 92  | 106 | 8.5  | 3.4 | 4.6  | 7.4  | 13.1 |
| Dimethomorph           | 0.007 | 87  | 102 | 15.3 | 4.6 | 6.4  | 6.8  | 14.7 |
| Dimoxystrobin          | 0.005 | 93  | 98  | 18.6 | 4.4 | 16.4 | 9.7  | 28.4 |
| Diniconazole           | 0.003 | 90  | 103 | 5.8  | 4.3 | 13.6 | 6.9  | 21.9 |
| Dinocap                | 0.007 | 85  | 103 | 6.5  | 5.4 | 16.8 | 3.3  | 24.7 |
| Dinotefuran            | 0.004 | 88  | 100 | 8.6  | 6.8 | 16.4 | 4.8  | 24.6 |
| Dinoterb               | 0.006 | 85  | 90  | 3.6  | 1.7 | 18.2 | 14.3 | 33.0 |
| Dioxacarb              | 0.002 | 93  | 96  | 6.2  | 2.9 | 9.9  | 9.7  | 19.9 |
| Dioxathion             | 0.009 | 111 | 98  | 9.8  | 9.1 | 10.3 | 4.2  | 17.0 |
| Diphenamid             | 0.006 | 91  | 100 | 14.9 | 1.1 | 10.9 | 11.6 | 23.7 |
| Diphenylamine          | 0.006 | 99  | 104 | 10.1 | 5.4 | 5.5  | 10.2 | 17.5 |
| Disulfoton             | 0.003 | 80  | 101 | 9.0  | 5.6 | 0.7  | 1.9  | 6.6  |
| Disulfoton sulfone     | 0.004 | 95  | 97  | 8.7  | 9.3 | 5.0  | 4.2  | 11.5 |
| Ditalimfos             | 0.007 | 103 | 109 | 15.1 | 2.2 | 17.2 | 4.2  | 25.8 |
| Dithianon              | 0.004 | 106 | 104 | 10.5 | 3.5 | 16.8 | 6.3  | 26.2 |
| Diuron                 | 0.005 | 92  | 96  | 11.0 | 2.2 | 8.4  | 3.4  | 14.8 |
| DMST                   | 0.004 | 106 | 102 | 8.7  | 7.8 | 8.1  | 4.2  | 15.0 |
| DNOC                   | 0.006 | 90  | 101 | 10.2 | 6.0 | 9.5  | 5.6  | 16.8 |
| Dodine                 | 0.005 | 108 | 88  | 9.4  | 3.7 | 16.1 | 9.2  | 26.6 |
| Emamectin benzoate     | 0.006 | 102 | 89  | 5.4  | 0.8 | 19.2 | 6.8  | 29.4 |
| Endosulfan sulfate     | 0.004 | 103 | 101 | 10.6 | 5.3 | 15.6 | 5.8  | 24.5 |
| Epoxiconazole          | 0.003 | 106 | 99  | 6.7  | 4.3 | 15.3 | 11.3 | 27.4 |
| EPTC                   | 0.008 | 83  | 97  | 11.0 | 3.6 | 15.2 | 4.1  | 22.6 |
| Esfenvalerate          | 0.005 | 95  | 89  | 4.2  | 2.6 | 13.3 | 3.6  | 19.8 |
| Etaconazole            | 0.005 | 94  | 92  | 15.2 | 2.8 | 10.6 | 2.3  | 17.6 |
| Ethametsulfuron methyl | 0.003 | 89  | 93  | 7.3  | 1.8 | 6.3  | 3.8  | 11.1 |
| Ethiofencarb           | 0.004 | 109 | 97  | 3.5  | 4.0 | 19.6 | 12.9 | 33.4 |
| Ethiofencarb-sulfone   | 0.007 | 105 | 102 | 10.3 | 2.4 | 8.4  | 6.0  | 16.4 |
| Ethiofencarb-sulfoxide | 0.009 | 107 | 97  | 11.2 | 3.2 | 11.8 | 4.6  | 18.9 |

|                            |       |     |     |      |     |      |      |      |
|----------------------------|-------|-----|-----|------|-----|------|------|------|
| Ethion                     | 0.003 | 108 | 102 | 3.5  | 4.7 | 3.9  | 8.3  | 14.3 |
| Ethiprole                  | 0.005 | 75  | 106 | 10.6 | 5.7 | 19.3 | 9.3  | 31.2 |
| Ethirimol                  | 0.004 | 102 | 100 | 12.7 | 5.7 | 8.1  | 13.0 | 22.6 |
| Ethofumesate               | 0.006 | 109 | 98  | 5.1  | 5.0 | 19.8 | 6.6  | 30.0 |
| Ethoprophos                | 0.006 | 108 | 98  | 5.9  | 5.4 | 17.1 | 13.7 | 31.3 |
| Ethoxyquin                 | 0.007 | 113 | 93  | 12.2 | 2.1 | 13.7 | 9.0  | 24.1 |
| Ethoxysulfuron             | 0.003 | 91  | 88  | 3.2  | 2.5 | 4.5  | 17.3 | 25.5 |
| Etofenprox                 | 0.004 | 107 | 102 | 4.5  | 6.8 | 10.3 | 14.3 | 25.2 |
| Etoxazole                  | 0.002 | 98  | 101 | 10.7 | 5.8 | 6.3  | 16.2 | 25.3 |
| Etrimfos                   | 0.007 | 97  | 101 | 10.2 | 5.4 | 5.5  | 6.7  | 13.7 |
| Famoxadone                 | 0.007 | 111 | 100 | 8.6  | 3.4 | 19.7 | 11.7 | 33.0 |
| Famphur                    | 0.008 | 85  | 90  | 11.5 | 8.0 | 11.2 | 6.0  | 19.2 |
| Fenamidone                 | 0.006 | 112 | 91  | 14.0 | 2.3 | 17.6 | 4.4  | 26.4 |
| Fenamiphos                 | 0.005 | 78  | 98  | 4.8  | 6.7 | 4.0  | 6.2  | 12.5 |
| Fenamiphos sulfoxide       | 0.002 | 84  | 101 | 16.5 | 8.6 | 10.0 | 5.7  | 19.1 |
| Fenamiphos-sulfone         | 0.009 | 78  | 105 | 7.2  | 6.0 | 8.5  | 4.1  | 14.8 |
| Fenarimol                  | 0.004 | 104 | 105 | 6.1  | 3.8 | 13.8 | 12.8 | 27.0 |
| Fenazaquin                 | 0.002 | 110 | 101 | 2.7  | 3.9 | 5.5  | 18.0 | 26.9 |
| Fenbuconazole              | 0.005 | 97  | 101 | 14.5 | 4.2 | 4.5  | 11.0 | 17.8 |
| Fenbutatin Oxide           | 0.002 | 95  | 93  | 9.1  | 1.5 | 6.5  | 5.5  | 13.6 |
| Fenchlorphos               | 0.008 | 99  | 95  | 14.4 | 9.1 | 15.5 | 8.9  | 27.0 |
| Fenchlorphos-oxon          | 0.004 | 89  | 98  | 8.4  | 9.1 | 11.3 | 10.2 | 23.4 |
| Fenhexamid                 | 0.006 | 100 | 100 | 6.3  | 6.9 | 8.9  | 15.0 | 25.3 |
| Fenobucarb                 | 0.003 | 111 | 104 | 3.7  | 2.1 | 19.4 | 14.6 | 35.0 |
| Fenoxaprop-P-ethyl         | 0.006 | 93  | 111 | 7.2  | 3.6 | 11.8 | 10.5 | 22.9 |
| Fenoxycarb                 | 0.005 | 99  | 102 | 3.4  | 5.5 | 7.2  | 2.3  | 11.5 |
| Fenpiclonil                | 0.003 | 93  | 110 | 13.6 | 4.0 | 7.8  | 4.5  | 14.5 |
| Fenpropathrin              | 0.003 | 108 | 105 | 5.3  | 3.3 | 11.1 | 4.4  | 17.3 |
| Fenpropidin                | 0.003 | 97  | 102 | 11.3 | 7.1 | 8.9  | 11.4 | 21.2 |
| Fenpropimorph              | 0.004 | 97  | 105 | 14.1 | 2.7 | 9.5  | 16.6 | 28.1 |
| Fenpyrazamine              | 0.002 | 93  | 97  | 7.6  | 2.5 | 7.0  | 1.6  | 10.8 |
| Fenpyroximate              | 0.005 | 94  | 92  | 11.3 | 2.2 | 10.7 | 5.0  | 18.3 |
| Fensulfothion              | 0.003 | 101 | 100 | 8.9  | 3.8 | 12.5 | 3.5  | 19.3 |
| Fensulfothion-oxon         | 0.004 | 92  | 102 | 9.7  | 3.6 | 10.9 | 5.7  | 18.7 |
| Fensulfothion-oxon sulfone | 0.004 | 93  | 102 | 10.9 | 3.2 | 18.0 | 10.7 | 30.3 |
| Fensulfothion sulfone      | 0.004 | 103 | 112 | 6.0  | 4.6 | 8.3  | 2.9  | 14.4 |

|                                |       |     |     |      |     |      |      |      |
|--------------------------------|-------|-----|-----|------|-----|------|------|------|
| Fenthion                       | 0.007 | 89  | 105 | 13.3 | 4.5 | 8.7  | 4.0  | 14.6 |
| Fenthion oxon                  | 0.006 | 95  | 100 | 9.8  | 3.5 | 4.9  | 6.8  | 14.0 |
| Fenthion oxon sulfoxide        | 0.006 | 100 | 101 | 18.9 | 5.2 | 10.5 | 5.9  | 19.6 |
| Fenthion sulfone               | 0.002 | 104 | 103 | 3.3  | 5.1 | 15.1 | 11.6 | 27.4 |
| Fenthion sulfoxide             | 0.006 | 85  | 97  | 13.1 | 6.2 | 4.2  | 2.4  | 8.8  |
| Fentin                         | 0.006 | 101 | 93  | 9.0  | 7.1 | 11.7 | 6.8  | 21.0 |
| Fentin hidroxide               | 0.006 | 91  | 107 | 14.6 | 1.5 | 6.7  | 3.2  | 12.3 |
| Fenvalerate                    | 0.003 | 86  | 91  | 10.4 | 2.8 | 10.7 | 8.3  | 20.0 |
| Fipronil                       | 0.009 | 105 | 104 | 13.1 | 5.6 | 17.3 | 3.8  | 26.1 |
| Flazasulfuron                  | 0.006 | 106 | 104 | 8.3  | 3.5 | 8.2  | 3.3  | 13.5 |
| Flonicamid                     | 0.005 | 103 | 103 | 4.2  | 3.9 | 7.4  | 4.7  | 13.8 |
| Florasulam                     | 0.006 | 97  | 110 | 19.1 | 3.4 | 11.7 | 4.3  | 19.8 |
| Florpyrauxifen benzyl          | 0.002 | 98  | 95  | 5.8  | 1.5 | 5.0  | 3.0  | 10.0 |
| Fluazifop                      | 0.005 | 100 | 101 | 8.5  | 3.0 | 6.3  | 7.7  | 14.8 |
| Fluazifop-butyl                | 0.003 | 96  | 95  | 3.0  | 2.4 | 10.6 | 4.5  | 16.7 |
| Fluazinam                      | 0.002 | 95  | 102 | 7.6  | 2.5 | 3.7  | 1.7  | 7.0  |
| Flubendiamide                  | 0.007 | 116 | 98  | 6.2  | 8.9 | 16.1 | 3.7  | 24.0 |
| Flubenzimine                   | 0.004 | 110 | 104 | 8.0  | 1.3 | 14.6 | 8.5  | 24.9 |
| Flucarbazone sodium            | 0.007 | 84  | 92  | 12.0 | 7.7 | 5.3  | 6.5  | 15.0 |
| Flucycloxuron                  | 0.004 | 101 | 91  | 8.5  | 1.8 | 14.0 | 7.7  | 22.9 |
| Fludioxonil                    | 0.005 | 111 | 100 | 1.6  | 3.9 | 18.9 | 3.5  | 27.5 |
| Flufenacet                     | 0.003 | 105 | 101 | 10.3 | 7.8 | 10.2 | 6.6  | 18.3 |
| Flufenoxuron                   | 0.004 | 100 | 103 | 6.4  | 4.2 | 7.7  | 6.1  | 15.6 |
| Flufenzine                     | 0.003 | 90  | 100 | 4.5  | 3.3 | 11.5 | 5.1  | 18.4 |
| Fluometuron                    | 0.006 | 105 | 96  | 5.0  | 8.7 | 18.3 | 5.5  | 27.5 |
| Fluopicolide                   | 0.007 | 109 | 107 | 11.2 | 4.4 | 8.0  | 2.5  | 13.4 |
| Fluopyram                      | 0.003 | 106 | 93  | 7.7  | 2.9 | 4.8  | 6.8  | 12.9 |
| Fluoxastrobin                  | 0.002 | 91  | 93  | 8.3  | 3.2 | 15.1 | 8.7  | 25.2 |
| Flupyradifurone                | 0.005 | 83  | 92  | 4.7  | 3.8 | 13.1 | 3.9  | 19.8 |
| Fluquinconazole                | 0.004 | 83  | 105 | 8.3  | 4.1 | 6.8  | 4.9  | 14.9 |
| Flurochloridone                | 0.006 | 99  | 104 | 9.0  | 7.7 | 9.8  | 5.8  | 17.6 |
| Fluroxypyr                     | 0.004 | 95  | 105 | 12.1 | 3.5 | 6.2  | 10.9 | 18.6 |
| Fluroxypyr-1-methylheptylester | 0.002 | 96  | 102 | 4.7  | 5.2 | 3.6  | 11.3 | 17.8 |
| Flusilazole                    | 0.003 | 86  | 105 | 17.0 | 4.6 | 7.2  | 10.0 | 19.1 |
| Flutolanil                     | 0.006 | 103 | 110 | 7.6  | 6.5 | 14.4 | 14.3 | 29.3 |
| Flutriafol                     | 0.006 | 106 | 97  | 8.5  | 4.3 | 7.9  | 7.7  | 16.6 |

|                            |       |     |     |      |     |      |      |      |
|----------------------------|-------|-----|-----|------|-----|------|------|------|
| Fluxapyrad                 | 0.004 | 91  | 109 | 17.5 | 6.1 | 18.9 | 8.1  | 30.1 |
| Fomesafen                  | 0.006 | 102 | 90  | 16.2 | 4.0 | 7.1  | 8.4  | 17.8 |
| Fonofos                    | 0.003 | 83  | 95  | 11.8 | 6.6 | 11.7 | 3.7  | 18.2 |
| Foramsulfuron              | 0.004 | 92  | 89  | 1.2  | 2.0 | 14.6 | 10.6 | 26.4 |
| Forchlorfenuron            | 0.003 | 102 | 96  | 4.6  | 2.8 | 14.4 | 2.8  | 21.3 |
| Formetanate hydrochloride  | 0.003 | 106 | 105 | 12.0 | 2.1 | 5.3  | 11.3 | 18.8 |
| Fosthiazate                | 0.003 | 105 | 99  | 6.0  | 3.9 | 10.1 | 4.2  | 16.0 |
| Fuberidazole               | 0.005 | 81  | 106 | 12.7 | 4.8 | 18.0 | 6.8  | 27.8 |
| Furalaxyl                  | 0.006 | 95  | 94  | 13.8 | 5.4 | 15.2 | 8.1  | 25.3 |
| Furathiocarb               | 0.004 | 92  | 104 | 16.3 | 3.7 | 18.8 | 9.2  | 31.3 |
| Furmecyclox                | 0.007 | 98  | 96  | 11.2 | 2.8 | 10.8 | 6.8  | 19.3 |
| Halauxifen free acid       | 0.004 | 95  | 98  | 12.0 | 4.7 | 6.5  | 4.4  | 12.5 |
| Halauxifen methyl          | 0.002 | 95  | 102 | 6.6  | 1.4 | 6.7  | 1.4  | 10.2 |
| Halfenprox                 | 0.007 | 99  | 93  | 12.9 | 3.8 | 10.9 | 10.7 | 23.1 |
| Halosulfuron methyl        | 0.005 | 108 | 104 | 6.8  | 3.7 | 16.3 | 1.3  | 23.7 |
| Haloxyfop                  | 0.006 | 105 | 99  | 8.0  | 7.0 | 15.1 | 3.6  | 22.6 |
| Haloxyfop-2-ethoxyethyl    | 0.006 | 108 | 93  | 7.2  | 2.5 | 19.7 | 6.4  | 29.9 |
| Haloxyfop-R-methyl         | 0.003 | 82  | 109 | 7.2  | 4.3 | 16.3 | 9.3  | 27.4 |
| Heptenophos                | 0.005 | 83  | 111 | 7.0  | 3.8 | 8.5  | 6.0  | 15.3 |
| Hexaconazole               | 0.004 | 103 | 101 | 11.4 | 4.2 | 17.8 | 13.4 | 32.0 |
| Hexaflumuron               | 0.005 | 108 | 105 | 6.1  | 3.2 | 10.3 | 7.5  | 18.5 |
| Hexazinone                 | 0.004 | 116 | 102 | 3.7  | 7.2 | 12.3 | 10.9 | 23.6 |
| Hexythiazox                | 0.003 | 92  | 104 | 5.6  | 6.0 | 7.5  | 18.3 | 28.6 |
| Imazalil                   | 0.005 | 110 | 101 | 3.9  | 6.1 | 5.5  | 5.9  | 13.8 |
| Imazaquin                  | 0.008 | 109 | 102 | 3.8  | 2.7 | 17.7 | 5.2  | 27.0 |
| Imazethapyr                | 0.008 | 107 | 94  | 4.8  | 2.3 | 13.3 | 7.1  | 22.2 |
| Imibenconazole             | 0.006 | 101 | 100 | 13.1 | 2.9 | 12.9 | 6.8  | 22.1 |
| Imidacloprid               | 0.003 | 105 | 99  | 9.0  | 6.4 | 10.9 | 5.6  | 18.2 |
| Indoxacarb                 | 0.003 | 108 | 106 | 5.4  | 4.7 | 6.2  | 7.6  | 15.1 |
| Iodosulfuron-methyl sodium | 0.009 | 97  | 103 | 14.3 | 2.4 | 15.3 | 5.0  | 23.8 |
| Ioxynil                    | 0.005 | 101 | 105 | 5.3  | 5.3 | 11.2 | 4.3  | 17.7 |
| Ipconazole                 | 0.007 | 95  | 94  | 11.2 | 2.9 | 13.9 | 3.3  | 21.2 |
| Iprodione                  | 0.006 | 94  | 105 | 13.1 | 7.0 | 12.1 | 7.2  | 21.4 |
| Iprovalicarb               | 0.005 | 86  | 102 | 12.4 | 4.7 | 3.5  | 5.3  | 11.4 |
| Isazofos                   | 0.008 | 110 | 100 | 12.6 | 2.7 | 8.0  | 5.8  | 15.2 |
| Isophenphos                | 0.003 | 101 | 101 | 8.6  | 3.8 | 14.5 | 4.7  | 22.0 |



|                          |       |     |     |      |     |      |      |      |
|--------------------------|-------|-----|-----|------|-----|------|------|------|
| Isoprocarb               | 0.003 | 82  | 102 | 9.9  | 6.5 | 7.0  | 6.2  | 14.6 |
| Isoproturon              | 0.004 | 80  | 98  | 10.0 | 4.4 | 7.6  | 10.3 | 18.7 |
| Isopyrazam               | 0.006 | 105 | 83  | 8.6  | 2.4 | 17.4 | 6.0  | 27.0 |
| Isoxadifen-ethyl         | 0.007 | 107 | 90  | 8.3  | 5.4 | 16.9 | 8.8  | 27.4 |
| Isoxaflutole             | 0.008 | 97  | 100 | 19.1 | 6.5 | 15.6 | 7.4  | 25.6 |
| Isoxathion               | 0.005 | 107 | 90  | 9.4  | 5.4 | 4.5  | 12.1 | 19.0 |
| Imazamox                 | 0.007 | 89  | 97  | 11.0 | 3.3 | 18.3 | 2.7  | 26.7 |
| Imazapyr                 | 0.004 | 96  | 92  | 6.2  | 1.5 | 16.7 | 9.0  | 27.3 |
| Imizapic                 | 0.005 | 105 | 102 | 5.6  | 2.7 | 4.8  | 2.4  | 8.5  |
| Indaziflam               | 0.002 | 90  | 96  | 6.6  | 3.1 | 13.9 | 4.5  | 21.7 |
| Isoxaben                 | 0.001 | 87  | 96  | 6.9  | 2.0 | 17.9 | 5.9  | 26.9 |
| Kresoxim methyl          | 0.006 | 107 | 101 | 7.7  | 6.5 | 10.6 | 8.3  | 20.0 |
| Lambda-cyhalothrin       | 0.006 | 96  | 95  | 10.4 | 4.0 | 10.6 | 4.0  | 17.3 |
| Lenacil                  | 0.005 | 100 | 103 | 15.5 | 7.8 | 11.3 | 16.8 | 29.9 |
| Linuron                  | 0.003 | 89  | 105 | 18.8 | 6.3 | 3.6  | 3.9  | 10.8 |
| Lufenuron                | 0.004 | 79  | 95  | 8.5  | 5.1 | 5.1  | 8.5  | 15.6 |
| Malaoxon                 | 0.003 | 88  | 98  | 8.1  | 8.9 | 3.7  | 13.4 | 20.4 |
| Malathion                | 0.006 | 101 | 108 | 13.4 | 3.2 | 12.3 | 13.0 | 26.5 |
| Mandipropamid            | 0.006 | 101 | 106 | 6.3  | 7.2 | 12.1 | 12.0 | 25.4 |
| MCPA                     | 0.005 | 105 | 100 | 5.7  | 6.2 | 6.2  | 8.0  | 15.8 |
| MCPA -2-ethylhexyl ester | 0.007 | 87  | 93  | 13.4 | 2.5 | 10.4 | 10.1 | 22.0 |
| MCPA-butyl ester         | 0.007 | 86  | 109 | 11.1 | 7.3 | 9.3  | 7.2  | 17.8 |
| MCPA-methyl ester        | 0.007 | 96  | 111 | 15.5 | 2.5 | 19.9 | 8.4  | 31.2 |
| MCPB                     | 0.004 | 107 | 98  | 10.0 | 4.0 | 16.3 | 5.7  | 25.5 |
| Mecarbam                 | 0.004 | 108 | 103 | 8.7  | 1.1 | 15.4 | 13.7 | 29.6 |
| Mecoprop                 | 0.001 | 88  | 90  | 4.8  | 1.5 | 16.0 | 3.8  | 24.0 |
| Mefentfluconazole        | 0.001 | 91  | 90  | 6.2  | 3.5 | 5.3  | 6.2  | 12.4 |
| Mepanipyrin              | 0.005 | 109 | 86  | 4.9  | 2.2 | 5.6  | 2.8  | 10.6 |
| Mephosfolan              | 0.003 | 88  | 98  | 7.6  | 1.3 | 6.4  | 6.3  | 13.4 |
| Mepronil                 | 0.004 | 110 | 99  | 5.5  | 5.4 | 17.0 | 12.7 | 30.4 |
| Meptydinocap             | 0.005 | 84  | 100 | 10.3 | 5.2 | 6.8  | 7.5  | 16.4 |
| Mesosulfuron methyl      | 0.003 | 88  | 91  | 10.0 | 1.8 | 6.7  | 3.8  | 12.0 |
| Mesotrione               | 0.006 | 112 | 110 | 4.1  | 4.2 | 5.0  | 7.7  | 14.0 |
| Metaflumizone            | 0.007 | 88  | 94  | 12.9 | 4.4 | 9.6  | 9.9  | 20.3 |
| Metalaxyl/ Metalaxyl M   | 0.003 | 95  | 99  | 3.8  | 5.5 | 3.8  | 11.6 | 17.6 |
| Metamitron               | 0.005 | 96  | 104 | 10.4 | 5.9 | 9.8  | 9.7  | 20.1 |

|                                           |       |     |     |      |     |      |      |      |
|-------------------------------------------|-------|-----|-----|------|-----|------|------|------|
| Metazachlor                               | 0.003 | 101 | 104 | 6.5  | 4.9 | 17.4 | 9.1  | 28.2 |
| Metconazole                               | 0.004 | 88  | 104 | 16.0 | 6.0 | 4.9  | 11.2 | 18.6 |
| Methabenzthiazuron                        | 0.005 | 107 | 100 | 12.9 | 5.8 | 11.6 | 10.9 | 24.1 |
| Methacrifos                               | 0.003 | 90  | 98  | 15.6 | 7.1 | 13.5 | 9.3  | 24.8 |
| Methamidophos                             | 0.003 | 88  | 101 | 9.9  | 6.2 | 5.4  | 4.6  | 11.3 |
| Methidathion                              | 0.004 | 78  | 101 | 1.1  | 6.4 | 11.2 | 2.9  | 17.1 |
| Methiocarb                                | 0.004 | 101 | 102 | 4.0  | 6.2 | 17.8 | 14.8 | 33.1 |
| Methiocarb sulfone                        | 0.005 | 80  | 100 | 9.5  | 7.6 | 8.3  | 9.4  | 18.4 |
| Methiocarb sulfoxide                      | 0.003 | 97  | 104 | 5.5  | 4.4 | 4.9  | 13.2 | 20.6 |
| Methomyl                                  | 0.004 | 91  | 104 | 18.3 | 2.6 | 9.7  | 14.3 | 26.5 |
| Methoprene                                | 0.009 | 96  | 96  | 15.0 | 3.0 | 12.6 | 7.7  | 21.9 |
| Methoprotryne                             | 0.007 | 96  | 101 | 17.1 | 4.7 | 8.4  | 8.1  | 17.9 |
| Methoxyfenozide                           | 0.005 | 108 | 104 | 5.0  | 7.9 | 15.2 | 12.9 | 28.7 |
| Metobromuron                              | 0.006 | 101 | 102 | 15.4 | 4.3 | 6.7  | 7.5  | 16.1 |
| Metolachlor                               | 0.005 | 111 | 100 | 7.9  | 5.8 | 17.0 | 8.0  | 27.0 |
| Metolcarb                                 | 0.006 | 110 | 104 | 6.9  | 5.2 | 13.5 | 9.2  | 23.9 |
| Metosulam                                 | 0.005 | 116 | 104 | 2.2  | 5.1 | 17.9 | 10.7 | 29.7 |
| Metoxuron                                 | 0.003 | 98  | 102 | 10.9 | 5.2 | 9.5  | 10.1 | 20.3 |
| Metrafenone                               | 0.005 | 91  | 104 | 14.4 | 2.4 | 9.6  | 11.1 | 21.7 |
| Metribuzin                                | 0.005 | 108 | 102 | 6.8  | 4.7 | 14.3 | 11.4 | 26.3 |
| Metsulfuron-methyl                        | 0.005 | 101 | 110 | 15.3 | 1.3 | 16.2 | 9.7  | 27.6 |
| Mevinphos                                 | 0.004 | 103 | 106 | 9.9  | 2.3 | 6.6  | 8.3  | 15.8 |
| Milbectin A3                              | 0.004 | 83  | 93  | 7.6  | 2.8 | 5.7  | 3.2  | 11.1 |
| Milbectin A4                              | 0.003 | 104 | 97  | 8.5  | 4.3 | 19.6 | 7.0  | 30.5 |
| Molinate                                  | 0.007 | 97  | 107 | 15.4 | 3.4 | 13.4 | 6.1  | 22.0 |
| Monocrotophos                             | 0.006 | 92  | 95  | 3.1  | 2.8 | 11.6 | 7.2  | 19.9 |
| Monolinuron                               | 0.004 | 104 | 98  | 10.7 | 5.8 | 12.9 | 10.0 | 23.8 |
| Monuron                                   | 0.004 | 108 | 113 | 15.5 | 1.8 | 8.2  | 1.1  | 13.6 |
| Myclobutanil                              | 0.004 | 110 | 109 | 11.0 | 3.1 | 14.5 | 15.9 | 31.5 |
| N,N-dimethylformamide                     | 0.004 | 92  | 105 | 12.4 | 2.8 | 9.5  | 8.1  | 19.4 |
| N-2,4-dimethylphenyl-N'-methylformamidine | 0.006 | 106 | 106 | 5.5  | 6.9 | 8.5  | 7.3  | 16.3 |
| Napropamide                               | 0.008 | 99  | 103 | 13.3 | 6.1 | 19.2 | 4.5  | 28.5 |
| Neburon                                   | 0.005 | 109 | 102 | 7.9  | 3.7 | 13.1 | 6.2  | 21.1 |
| Nicosulfuron                              | 0.003 | 79  | 95  | 10.4 | 2.0 | 19.6 | 3.7  | 28.8 |
| Nitenpyram                                | 0.002 | 101 | 103 | 12.5 | 5.1 | 6.6  | 15.9 | 25.6 |
| Nitrapyrin                                | 0.003 | 98  | 98  | 11.2 | 7.1 | 7.9  | 8.4  | 18.2 |

|                      |       |     |     |      |     |      |      |      |
|----------------------|-------|-----|-----|------|-----|------|------|------|
| Norflurazon          | 0.005 | 95  | 96  | 16.4 | 2.8 | 16.6 | 4.6  | 25.3 |
| Novaluron            | 0.004 | 89  | 91  | 13.7 | 1.8 | 17.7 | 3.5  | 26.4 |
| Nuarimol             | 0.006 | 99  | 106 | 4.8  | 7.2 | 5.9  | 4.3  | 12.0 |
| Ofurace              | 0.004 | 99  | 100 | 13.4 | 1.5 | 4.4  | 8.8  | 15.1 |
| Omethoate            | 0.006 | 86  | 103 | 11.1 | 3.8 | 6.0  | 4.1  | 12.2 |
| Orthosulfamuron      | 0.005 | 81  | 91  | 7.4  | 2.9 | 11.6 | 14.2 | 26.4 |
| Oxadixyl             | 0.004 | 101 | 106 | 6.1  | 4.1 | 15.9 | 8.5  | 25.7 |
| Oxamyl               | 0.002 | 109 | 105 | 10.9 | 6.0 | 7.0  | 16.4 | 25.8 |
| Oxasulfuron          | 0.005 | 86  | 96  | 11.4 | 2.6 | 5.5  | 3.2  | 10.1 |
| Oxycarboxin          | 0.007 | 111 | 104 | 2.1  | 1.3 | 10.8 | 4.3  | 16.8 |
| Paclobutrazol        | 0.003 | 104 | 96  | 3.8  | 3.3 | 15.7 | 9.4  | 26.3 |
| Paraoxon-ethyl       | 0.005 | 101 | 101 | 10.1 | 5.8 | 7.3  | 3.4  | 13.7 |
| Paraoxon-methyl      | 0.004 | 101 | 100 | 6.1  | 8.9 | 4.4  | 12.2 | 19.0 |
| Pebulate             | 0.008 | 96  | 101 | 11.5 | 2.8 | 18.7 | 9.4  | 30.4 |
| Penconazole          | 0.005 | 108 | 98  | 10.5 | 5.1 | 14.6 | 11.4 | 26.9 |
| Pencycuron           | 0.003 | 113 | 106 | 4.4  | 6.0 | 18.0 | 13.7 | 32.3 |
| Pendimethalin        | 0.003 | 101 | 106 | 11.7 | 3.8 | 8.8  | 13.3 | 23.2 |
| Penflufen            | 0.002 | 91  | 96  | 5.9  | 1.5 | 8.2  | 3.0  | 13.1 |
| Penoxsulam           | 0.004 | 99  | 91  | 7.0  | 2.0 | 9.4  | 10.5 | 20.3 |
| Penthiopyrad         | 0.003 | 89  | 99  | 7.1  | 1.6 | 11.2 | 2.9  | 17.5 |
| Phenmedipham         | 0.005 | 79  | 110 | 7.1  | 3.2 | 7.1  | 3.9  | 12.3 |
| Phenothrin           | 0.007 | 96  | 89  | 12.1 | 2.3 | 14.2 | 6.2  | 23.7 |
| Phenthoate           | 0.005 | 112 | 100 | 4.7  | 8.0 | 4.5  | 11.3 | 18.0 |
| Phosalone            | 0.002 | 102 | 105 | 4.8  | 6.2 | 14.5 | 5.7  | 22.5 |
| Phosmet              | 0.005 | 117 | 107 | 2.7  | 3.9 | 19.7 | 10.1 | 31.6 |
| Phosmet-oxon         | 0.008 | 102 | 91  | 10.0 | 2.6 | 14.0 | 4.5  | 21.5 |
| Phosphamidon         | 0.003 | 108 | 107 | 5.3  | 4.3 | 7.3  | 12.2 | 20.6 |
| Phoxim               | 0.005 | 97  | 101 | 11.1 | 1.7 | 12.1 | 8.4  | 21.7 |
| Picloram             | 0.008 | 93  | 107 | 16.8 | 3.4 | 12.5 | 2.2  | 19.4 |
| Picolinafen          | 0.006 | 97  | 107 | 12.1 | 0.7 | 19.5 | 10.6 | 32.0 |
| Picoxystrobin        | 0.005 | 101 | 90  | 11.2 | 1.4 | 19.7 | 6.7  | 29.9 |
| Pinoxaden            | 0.004 | 77  | 92  | 6.1  | 2.6 | 8.1  | 5.6  | 14.3 |
| Pirimicarb           | 0.003 | 105 | 106 | 5.8  | 7.8 | 5.1  | 6.6  | 12.6 |
| Pirimicarb-desmethyl | 0.002 | 105 | 111 | 6.6  | 1.7 | 5.2  | 6.4  | 12.1 |
| Pirimiphos-methyl    | 0.002 | 95  | 105 | 5.1  | 9.2 | 7.9  | 10.7 | 19.4 |
| Pirimiphos-ethyl     | 0.006 | 96  | 91  | 16.1 | 2.3 | 13.5 | 4.6  | 21.2 |

|                           |       |     |     |      |     |      |      |      |
|---------------------------|-------|-----|-----|------|-----|------|------|------|
| Prochloraz                | 0.005 | 105 | 106 | 3.3  | 7.0 | 15.6 | 8.9  | 26.0 |
| Profenofos                | 0.003 | 105 | 105 | 3.1  | 6.1 | 8.7  | 17.0 | 27.3 |
| Profoxidim                | 0.003 | 101 | 89  | 11.9 | 1.9 | 17.1 | 8.0  | 27.9 |
| Prohexadione calcium      | 0.007 | 85  | 90  | 17.8 | 2.5 | 4.6  | 5.5  | 12.4 |
| Prometryn                 | 0.003 | 106 | 110 | 7.8  | 2.4 | 9.2  | 10.4 | 20.2 |
| Propachlor                | 0.006 | 98  | 106 | 18.4 | 7.9 | 8.8  | 7.2  | 18.2 |
| Propamocarb               | 0.003 | 100 | 110 | 4.1  | 2.4 | 4.9  | 9.5  | 15.6 |
| Propamocarb-hydrochloride | 0.005 | 84  | 104 | 12.4 | 2.2 | 18.2 | 4.5  | 27.0 |
| Propanil                  | 0.005 | 92  | 105 | 10.2 | 3.2 | 9.4  | 4.1  | 16.1 |
| Propaquizafop             | 0.007 | 101 | 100 | 11.2 | 2.2 | 10.7 | 7.9  | 19.4 |
| Propargite                | 0.003 | 115 | 104 | 2.6  | 6.6 | 12.1 | 10.6 | 23.3 |
| Propazine                 | 0.004 | 88  | 102 | 17.7 | 6.8 | 3.3  | 7.3  | 14.0 |
| Propetamphos              | 0.005 | 90  | 108 | 14.6 | 6.6 | 8.6  | 2.9  | 14.6 |
| Propham                   | 0.004 | 86  | 105 | 8.2  | 3.4 | 19.0 | 7.5  | 29.8 |
| Propiconazole             | 0.003 | 109 | 105 | 6.0  | 3.7 | 7.8  | 13.2 | 22.3 |
| Propoxur                  | 0.004 | 109 | 108 | 2.0  | 4.3 | 11.5 | 4.3  | 18.1 |
| Propoxycarbazone-sodium   | 0.006 | 88  | 93  | 10.7 | 3.9 | 10.1 | 4.1  | 16.5 |
| Propyzamide               | 0.005 | 103 | 105 | 12.9 | 6.0 | 3.5  | 7.9  | 15.0 |
| Proquinazid               | 0.005 | 89  | 99  | 11.5 | 1.9 | 10.6 | 10.0 | 21.1 |
| Prosulfocarb              | 0.006 | 98  | 93  | 10.4 | 0.9 | 13.9 | 7.9  | 23.2 |
| Prosulfuron               | 0.004 | 82  | 109 | 13.3 | 5.9 | 12.3 | 7.4  | 21.3 |
| Prothioconazole           | 0.003 | 82  | 104 | 11.5 | 8.1 | 5.6  | 3.8  | 12.1 |
| Prothioconazole desthio   | 0.002 | 92  | 93  | 3.7  | 2.1 | 18.3 | 2.3  | 26.7 |
| Prothiophos               | 0.004 | 111 | 110 | 3.8  | 1.6 | 18.2 | 13.2 | 31.9 |
| Pymetrozine               | 0.003 | 107 | 107 | 5.4  | 1.9 | 17.8 | 6.8  | 27.4 |
| Pyraclostrobin            | 0.005 | 95  | 106 | 13.8 | 5.6 | 9.2  | 15.3 | 26.0 |
| Pyraflufen-ethyl          | 0.005 | 94  | 103 | 18.1 | 7.9 | 10.5 | 14.9 | 27.0 |
| Pyrazophos                | 0.002 | 113 | 104 | 3.8  | 2.8 | 17.3 | 11.5 | 29.6 |
| Pyretrins                 | 0.004 | 102 | 93  | 11.0 | 1.9 | 14.6 | 1.6  | 21.6 |
| Pyridaben                 | 0.003 | 113 | 108 | 3.0  | 5.4 | 16.2 | 6.8  | 25.1 |
| Pyridalyl                 | 0.004 | 94  | 109 | 5.7  | 6.0 | 18.1 | 10.2 | 29.6 |
| Pyridaphenthion           | 0.005 | 105 | 102 | 3.9  | 4.9 | 13.6 | 11.1 | 25.2 |
| Pyridate                  | 0.001 | 90  | 94  | 15.6 | 1.9 | 17.8 | 7.8  | 28.2 |
| Pyrifenox                 | 0.006 | 90  | 102 | 14.7 | 7.7 | 5.6  | 11.2 | 19.0 |
| Pyrimethanil              | 0.003 | 99  | 101 | 16.0 | 4.2 | 15.3 | 7.1  | 24.9 |
| Pyrimidifen               | 0.002 | 91  | 98  | 6.6  | 1.9 | 7.3  | 10.3 | 18.2 |

|                              |       |     |     |      |     |      |      |      |
|------------------------------|-------|-----|-----|------|-----|------|------|------|
| Pyriofenone                  | 0.003 | 92  | 98  | 5.8  | 1.8 | 6.0  | 5.2  | 11.9 |
| Pyriproxyfen                 | 0.002 | 108 | 106 | 5.4  | 5.9 | 15.6 | 11.0 | 27.2 |
| Pyroxasulfone                | 0.003 | 96  | 102 | 5.6  | 5.5 | 9.8  | 6.5  | 17.8 |
| Pyroxsulam                   | 0.004 | 103 | 103 | 5.4  | 4.0 | 5.8  | 5.1  | 13.5 |
| Quinalphos                   | 0.007 | 105 | 102 | 11.2 | 7.4 | 10.8 | 4.1  | 17.4 |
| Quinclorac                   | 0.004 | 94  | 90  | 15.8 | 3.7 | 19.0 | 8.1  | 30.2 |
| Quinmerac                    | 0.002 | 90  | 87  | 7.9  | 1.6 | 19.9 | 12.6 | 33.9 |
| Quinomethionate              | 0.006 | 93  | 101 | 19.4 | 4.2 | 15.0 | 6.8  | 25.0 |
| Quinoxyfen                   | 0.002 | 101 | 106 | 4.9  | 4.7 | 6.8  | 11.8 | 19.7 |
| Quizalofop ethyl             | 0.004 | 86  | 104 | 11.8 | 3.6 | 8.0  | 17.6 | 28.0 |
| Resmethrin                   | 0.003 | 104 | 103 | 2.6  | 5.2 | 12.3 | 11.8 | 24.6 |
| Rimsulfuron                  | 0.004 | 108 | 103 | 6.5  | 5.1 | 8.2  | 9.5  | 18.5 |
| Sedaxane                     | 0.003 | 91  | 107 | 10.2 | 3.4 | 6.6  | 5.4  | 14.1 |
| Sethoxydim                   | 0.004 | 107 | 88  | 5.8  | 2.9 | 11.6 | 5.7  | 18.8 |
| Silthiofam                   | 0.007 | 92  | 95  | 7.7  | 2.5 | 11.0 | 5.1  | 18.0 |
| Simazine                     | 0.004 | 91  | 108 | 17.7 | 4.9 | 5.0  | 5.1  | 13.5 |
| S-Metolachlor                | 0.007 | 108 | 89  | 5.8  | 3.8 | 9.4  | 5.2  | 15.6 |
| Spinetoram                   | 0.006 | 106 | 90  | 8.4  | 2.9 | 15.9 | 1.4  | 23.1 |
| Spinosad                     | 0.004 | 100 | 109 | 6.9  | 7.5 | 18.3 | 11.8 | 31.5 |
| Spirodiclofen                | 0.002 | 92  | 91  | 2.3  | 0.9 | 14.8 | 7.1  | 23.4 |
| Spiromesifen                 | 0.005 | 79  | 94  | 13.9 | 3.1 | 11.8 | 9.1  | 21.8 |
| Spirotetramat                | 0.003 | 96  | 108 | 15.9 | 2.7 | 14.3 | 6.4  | 23.0 |
| Spirotetramat-enol-glucoside | 0.003 | 91  | 90  | 4.8  | 2.2 | 8.6  | 5.2  | 15.8 |
| Spirotetramat-mono-hydroxy   | 0.005 | 91  | 97  | 5.4  | 3.0 | 7.2  | 5.0  | 14.1 |
| Spirotetramat-enol           | 0.005 | 104 | 100 | 8.6  | 5.2 | 16.7 | 6.8  | 26.8 |
| Spirotetramat-keto           | 0.003 | 90  | 92  | 5.5  | 2.0 | 10.3 | 10.6 | 21.6 |
| Spiroxamine                  | 0.003 | 104 | 105 | 6.1  | 4.9 | 6.0  | 8.2  | 14.8 |
| Sulfosulfuron                | 0.007 | 107 | 99  | 13.2 | 3.3 | 8.2  | 3.8  | 15.3 |
| Sulfotep                     | 0.005 | 92  | 89  | 16.6 | 3.0 | 12.8 | 7.9  | 22.1 |
| Sulfoxaflor                  | 0.003 | 96  | 102 | 9.0  | 1.9 | 18.6 | 13.9 | 33.1 |
| Tau-fluvalinate              | 0.005 | 100 | 99  | 5.9  | 3.7 | 16.2 | 4.1  | 25.0 |
| Tebuconazole                 | 0.006 | 113 | 103 | 4.3  | 5.3 | 11.8 | 12.0 | 24.4 |
| Tebufenozide                 | 0.003 | 106 | 106 | 7.2  | 9.1 | 13.2 | 14.6 | 28.7 |
| Tebufenpyrad                 | 0.002 | 100 | 105 | 3.0  | 4.5 | 6.2  | 10.7 | 17.9 |
| Tebutam                      | 0.005 | 106 | 101 | 9.0  | 7.5 | 7.3  | 12.5 | 21.5 |
| Teflubenzuron                | 0.005 | 104 | 92  | 5.1  | 4.2 | 8.3  | 7.6  | 16.5 |

|                         |       |     |     |      |      |      |      |      |
|-------------------------|-------|-----|-----|------|------|------|------|------|
| Tembotrione             | 0.005 | 77  | 105 | 8.8  | 1.8  | 10.2 | 6.7  | 19.2 |
| Tembotrione metabolite  | 0.006 | 79  | 107 | 6.4  | 2.4  | 7.2  | 6.2  | 14.7 |
| Tepraloxydim            | 0.006 | 96  | 101 | 9.7  | 5.6  | 11.8 | 9.3  | 22.1 |
| Terbacil                | 0.005 | 94  | 93  | 11.6 | 10.6 | 7.4  | 6.4  | 16.1 |
| Terbufos                | 0.003 | 111 | 106 | 3.5  | 5.7  | 19.5 | 12.5 | 33.0 |
| Terbumeton              | 0.008 | 100 | 94  | 13.0 | 3.0  | 18.9 | 10.1 | 30.8 |
| Terbuthylazine          | 0.003 | 90  | 108 | 10.3 | 3.7  | 6.6  | 9.0  | 16.8 |
| Terbuthylazine-desethyl | 0.003 | 112 | 106 | 5.8  | 6.8  | 16.5 | 8.8  | 27.2 |
| Terbutryn               | 0.002 | 113 | 110 | 2.9  | 4.9  | 13.1 | 11.0 | 24.4 |
| Tetrachlorvinphos       | 0.006 | 81  | 108 | 11.2 | 2.9  | 4.7  | 5.0  | 11.2 |
| Tetraconazole           | 0.004 | 102 | 104 | 10.4 | 7.5  | 13.8 | 12.4 | 27.3 |
| Tetramethrin            | 0.001 | 91  | 93  | 5.0  | 2.2  | 4.2  | 1.6  | 7.5  |
| Thiabendazole           | 0.002 | 113 | 108 | 7.3  | 1.9  | 9.8  | 2.5  | 15.4 |
| Thiacloprid             | 0.003 | 110 | 106 | 4.4  | 6.0  | 12.5 | 6.9  | 20.7 |
| Thiamethoxam            | 0.005 | 102 | 109 | 7.1  | 6.1  | 16.2 | 9.4  | 26.9 |
| Thidiazuron             | 0.004 | 94  | 107 | 15.9 | 7.8  | 15.6 | 9.7  | 27.1 |
| Thiencarbazone-methyl   | 0.006 | 96  | 93  | 7.8  | 3.3  | 9.7  | 5.2  | 18.7 |
| Thifensulfuron-methyl   | 0.006 | 106 | 91  | 10.3 | 2.3  | 12.5 | 9.6  | 23.2 |
| Thiobencarb             | 0.007 | 105 | 98  | 9.7  | 2.5  | 9.0  | 4.8  | 16.1 |
| Thiodicarb              | 0.005 | 110 | 102 | 6.6  | 5.4  | 18.9 | 10.9 | 31.1 |
| Thiofanox-sulfoxide     | 0.005 | 99  | 107 | 13.0 | 5.1  | 17.8 | 10.6 | 30.3 |
| Thiometon               | 0.007 | 88  | 104 | 7.9  | 5.2  | 13.3 | 3.9  | 20.8 |
| Thiophonate-methyl      | 0.004 | 104 | 100 | 9.4  | 7.0  | 6.7  | 4.8  | 13.0 |
| Thiram                  | 0.002 | 91  | 100 | 8.2  | 1.5  | 8.4  | 7.1  | 15.9 |
| Tolclophos-methyl       | 0.002 | 105 | 108 | 7.3  | 3.9  | 7.5  | 7.8  | 16.3 |
| Tolyfenpyrad            | 0.002 | 91  | 92  | 5.2  | 1.9  | 7.1  | 2.8  | 11.4 |
| Tolyfluanide            | 0.003 | 102 | 106 | 15.3 | 5.0  | 12.8 | 14.2 | 27.8 |
| Tralkoxydim             | 0.006 | 107 | 90  | 7.8  | 2.2  | 9.1  | 5.5  | 15.5 |
| Triadimefon             | 0.003 | 104 | 106 | 12.4 | 4.6  | 10.2 | 6.8  | 18.4 |
| Triadimenol             | 0.006 | 106 | 103 | 9.1  | 4.9  | 19.2 | 1.8  | 28.1 |
| Tri-allate              | 0.003 | 89  | 96  | 13.5 | 2.6  | 7.9  | 4.2  | 13.7 |
| Triasulfuron            | 0.006 | 104 | 103 | 12.8 | 5.0  | 10.9 | 5.6  | 18.6 |
| Triazamate              | 0.007 | 100 | 103 | 8.7  | 1.9  | 4.0  | 4.3  | 10.5 |
| Triazophos              | 0.006 | 107 | 106 | 6.5  | 4.9  | 13.3 | 16.3 | 30.0 |
| Tribenuron-methyl       | 0.003 | 98  | 104 | 17.5 | 8.3  | 6.7  | 5.4  | 14.3 |
| Trichlorfon             | 0.004 | 96  | 104 | 12.1 | 5.8  | 7.2  | 4.8  | 14.4 |

|                         |       |     |     |      |     |      |      |      |
|-------------------------|-------|-----|-----|------|-----|------|------|------|
| Triclopyr               | 0.006 | 84  | 87  | 10.9 | 3.0 | 17.0 | 4.4  | 25.7 |
| Tricyclazole            | 0.008 | 101 | 105 | 11.7 | 4.3 | 12.7 | 4.9  | 20.3 |
| Tridemorph              | 0.008 | 101 | 85  | 10.9 | 2.8 | 11.2 | 6.3  | 19.1 |
| Trifloxystrobin         | 0.002 | 110 | 106 | 1.4  | 5.7 | 18.6 | 11.4 | 31.0 |
| Trifloxysulfuron-sodium | 0.003 | 96  | 99  | 11.5 | 7.0 | 7.1  | 12.9 | 23.3 |
| Triflumizole            | 0.004 | 107 | 106 | 8.2  | 5.8 | 14.6 | 5.4  | 22.6 |
| Triflumuron             | 0.004 | 102 | 106 | 8.7  | 5.4 | 15.2 | 4.6  | 23.0 |
| Triflusulfuron-methyl   | 0.002 | 83  | 88  | 4.2  | 4.3 | 4.2  | 7.8  | 13.6 |
| Triforine               | 0.005 | 96  | 89  | 3.0  | 3.0 | 12.4 | 7.0  | 20.6 |
| Trinexapac              | 0.007 | 96  | 94  | 3.0  | 6.1 | 16.1 | 5.4  | 24.6 |
| Triticonazole           | 0.003 | 105 | 111 | 4.8  | 5.2 | 15.1 | 8.7  | 25.1 |
| Tritosulfuron           | 0.008 | 102 | 87  | 13.9 | 6.1 | 9.3  | 5.4  | 20.0 |
| Uniconazole             | 0.007 | 104 | 101 | 5.2  | 2.1 | 7.0  | 7.2  | 15.0 |
| Valifenalate            | 0.002 | 97  | 96  | 5.6  | 2.0 | 14.1 | 2.3  | 21.4 |
| Vamidothion             | 0.008 | 90  | 104 | 16.2 | 3.3 | 10.5 | 4.8  | 17.9 |
| Zoxamide                | 0.005 | 102 | 105 | 16.8 | 7.7 | 6.7  | 12.6 | 21.5 |
